# Supplementary material
Source: PubMed Central journal article supplement (PMC5173427)
Supplement: NIHMS829706-supplement-Online_supplement.pdf [file NIHMS829706-supplement-Online_supplement.pdf]

## **SUPPLEMENTAL MATERIAL**

### **Hospital Variation in Time to Epinephrine for Non-Shockable In-Hospital Cardiac Arrest**

Rohan Khera MD, Paul S. Chan MD MSc, Michael Donnino MD, Saket Girotra MD SM  
for the American Heart Association's Get With The Guidelines-Resuscitation Investigators

## Online-only Figures

**eFigure 1:** Flowchart depicting selection of patients and hospitals.

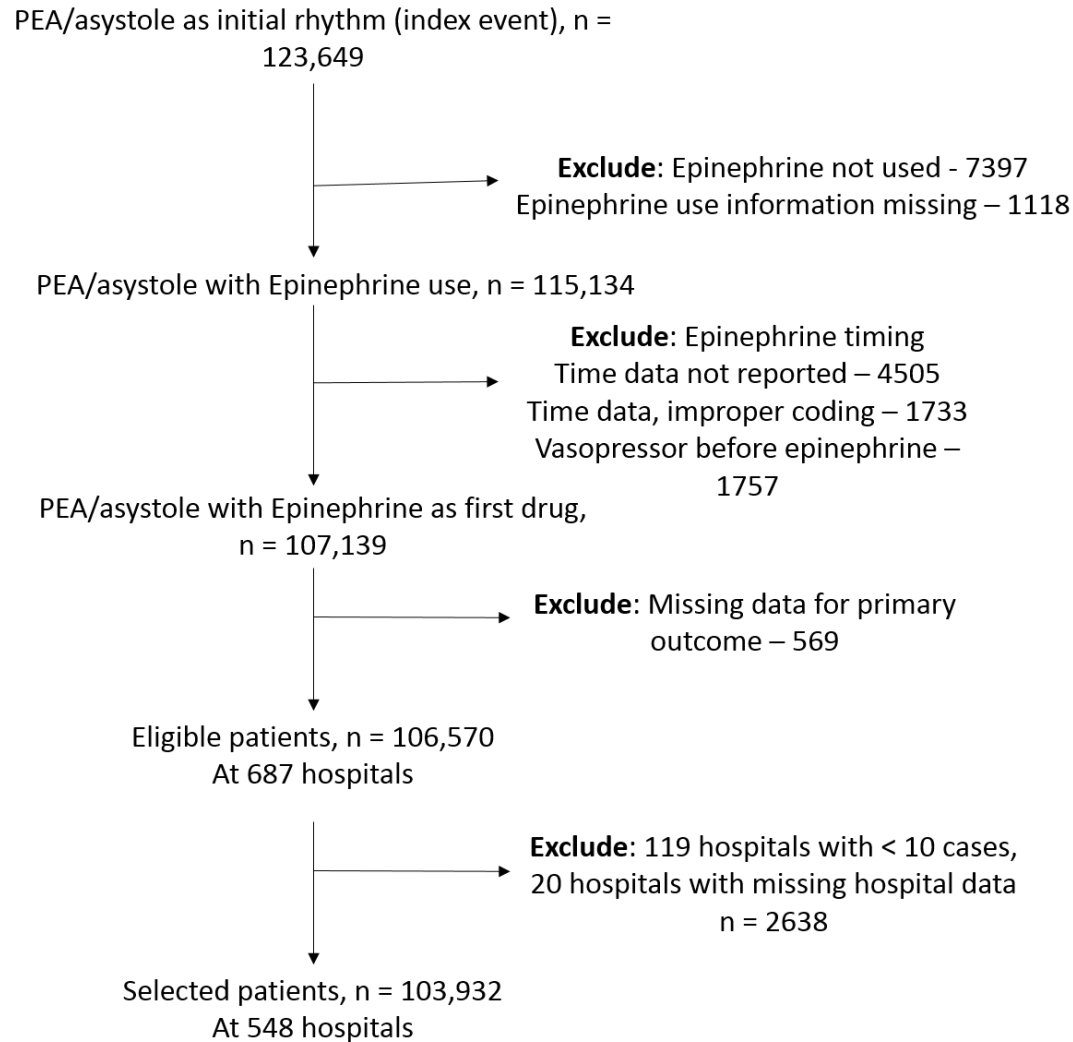

**eFigure 2: Non-ICU** - Rate of delayed epinephrine administration (first dose > 5 minutes) in non-intensive care unit (non-ICU) patients - across 476 hospitals with at least 10 non-ICU non-shockable cardiac arrest cases. **Median Odds Ratio – 1.48 (95% C.I. 1.42, 1.54).**

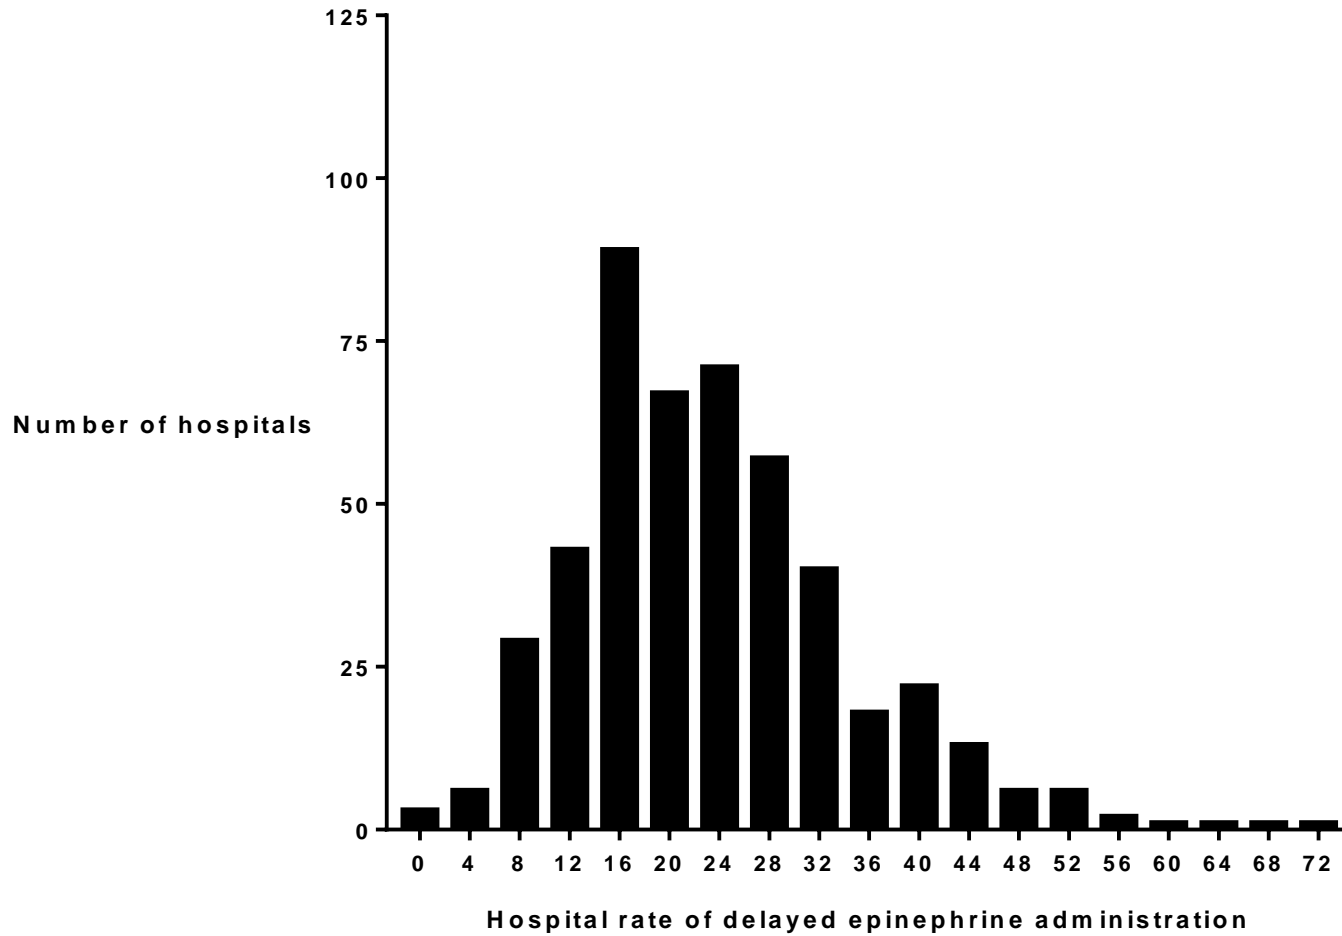

**eFigure 3: Non-ICU** - Association between hospital rate of delayed epinephrine administration in non-ICU non-shockable cardiac arrests and its cardiac arrest survival (*correlation coefficient -0.19, P-value <.0001*), and across hospital quartiles of delayed epinephrine use.

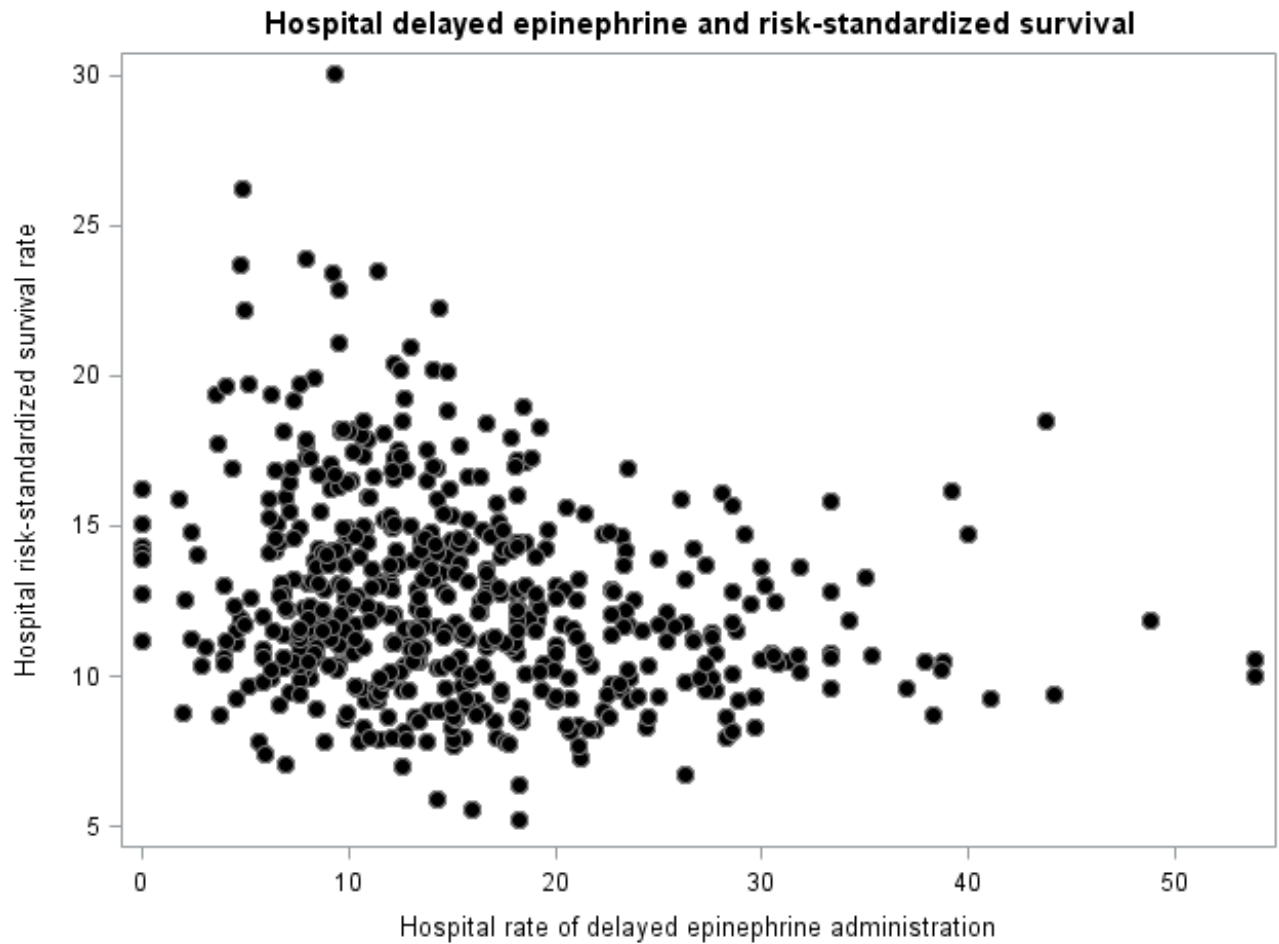

|                                                                              | Quartiles of delay    |                       |                       |                       | P-value (trend) |
|------------------------------------------------------------------------------|-----------------------|-----------------------|-----------------------|-----------------------|-----------------|
|                                                                              | Q1                    | Q2                    | Q3                    | Q4                    |                 |
| <b>Median Hospital risk-standardized survival rate (Interquartile range)</b> | 13.3% (11.6% - 16.6%) | 14.3% (11.7% - 16.9%) | 13.0% (10.9% - 16.4%) | 12.0% (10.4% - 14.1%) | <.0001          |

**eFigure 4: Excluding patients receiving vasopressors** - Rate of delayed epinephrine administration (first dose > 5 minutes) in patients not receiving vasopressors at the time of cardiac arrest- across 534 hospitals with at least 10 non-shockable cardiac arrest cases. **Median Odds Ratio – 1.51 (95% C.I.1.44, 1.57)**.

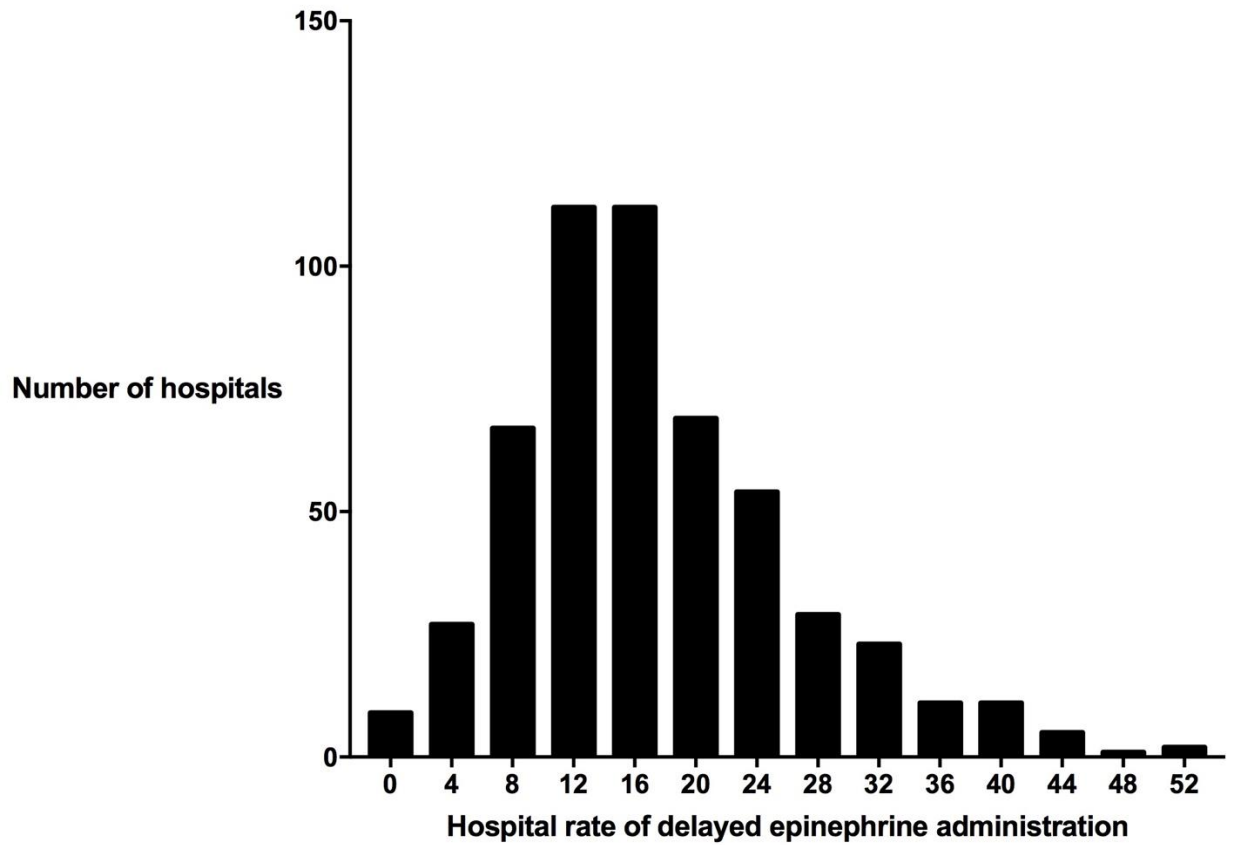

**eFigure 5: Excluding patients receiving vasopressors** - Association between hospital rate of delayed epinephrine administration in patients not receiving vasopressors with non-shockable cardiac arrests and its cardiac arrest survival (*correlation coefficient -0.22. P-value <.0001*) and across hospital quartiles of delayed epinephrine use.

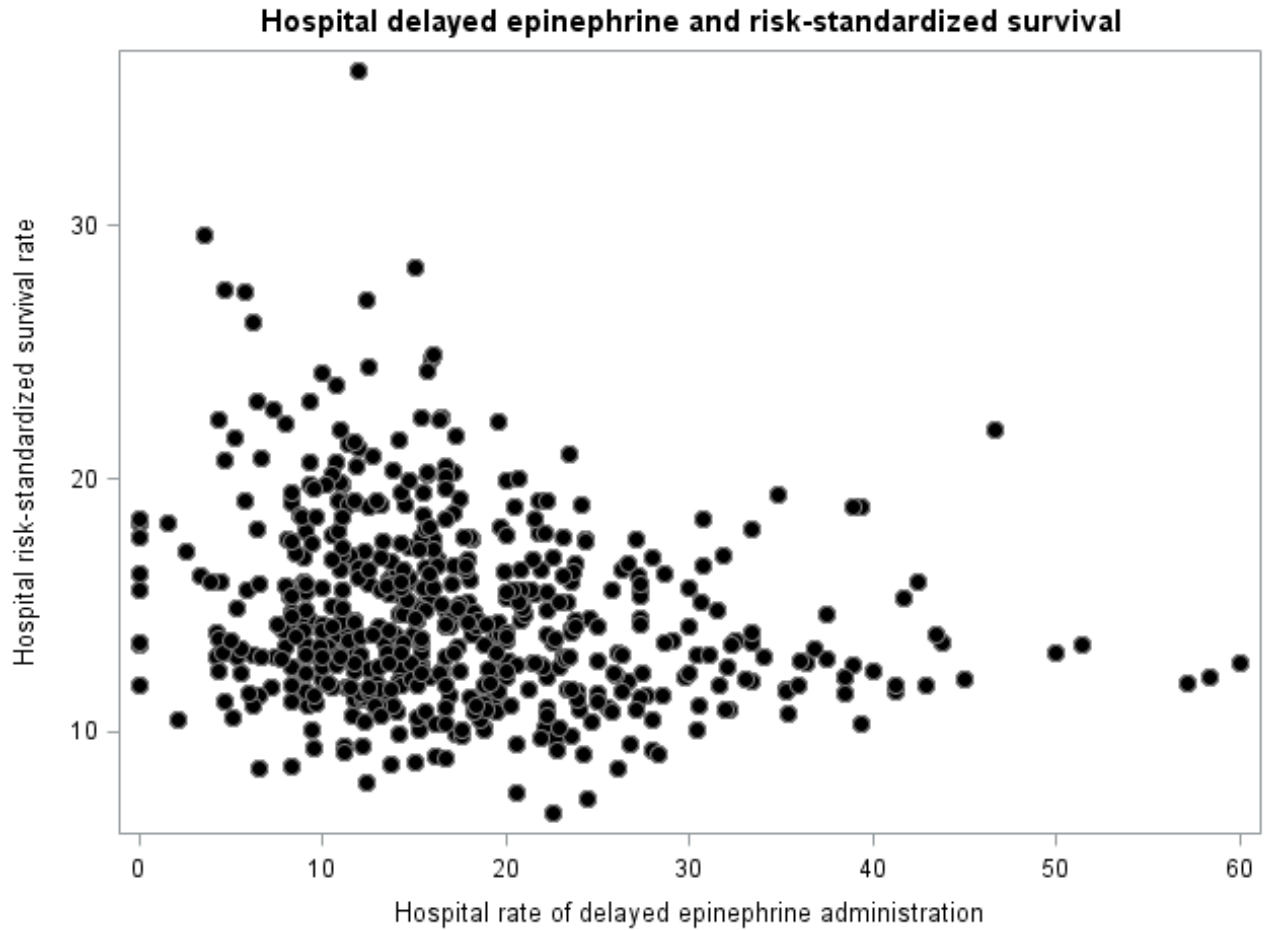

|                                                                              | Quartiles of delay   |                      |                      |                      | P-value (trend) |
|------------------------------------------------------------------------------|----------------------|----------------------|----------------------|----------------------|-----------------|
|                                                                              | Q1                   | Q2                   | Q3                   | Q4                   |                 |
| <b>Median Hospital risk-standardized survival rate (Interquartile range)</b> | 14.6% (12.9%, 18.0%) | 14.7% (12.3%, 17.2%) | 14.4% (12.3%, 16.8%) | 12.9% (11.6%, 15.1%) | <.0001          |

## Online-only Tables

**eTable 1: Description of variables included in the study.**

| Variable                                                          | Definition                                                                                                                                                                                                                                                                                                                                  |
|-------------------------------------------------------------------|---------------------------------------------------------------------------------------------------------------------------------------------------------------------------------------------------------------------------------------------------------------------------------------------------------------------------------------------|
| <b>Demographics</b>                                               |                                                                                                                                                                                                                                                                                                                                             |
| Age                                                               | Age in years                                                                                                                                                                                                                                                                                                                                |
| Sex                                                               | Self-reported (male or female)                                                                                                                                                                                                                                                                                                              |
| Race                                                              | Self-reported (white, black or other)                                                                                                                                                                                                                                                                                                       |
| <b>Cardiac arrest characteristics</b>                             |                                                                                                                                                                                                                                                                                                                                             |
| Initial cardiac arrest rhythm                                     | First documented rhythm at the time of cardiac arrest (asystole or Pulseless Electrical Activity [PEA])                                                                                                                                                                                                                                     |
| Hospital location                                                 | Location of patient in the hospital at the time of cardiac arrest (ICU, monitored unit [telemetry], or non-monitored unit)                                                                                                                                                                                                                  |
| Delayed chest compression                                         | Initiation of chest compression >1 minute from the onset of cardiac arrest                                                                                                                                                                                                                                                                  |
| Time of cardiac arrest                                            | Time of day when cardiac arrest daytime (working hours [7:00 AM – 10:59] or nighttime [11:00 PM – 6:59 AM])                                                                                                                                                                                                                                 |
| Weekend/Holiday arrest                                            | Weekend [Saturday, Sunday] or National Holiday on day of cardiac arrest                                                                                                                                                                                                                                                                     |
| Use of a hospital-wide cardiopulmonary arrest alert (“Code Blue”) | Use of a general hospital broadcast method for cardiac arrest notification (e.g., overhead pagers or audio alert)                                                                                                                                                                                                                           |
| <b>Co-morbidities</b>                                             |                                                                                                                                                                                                                                                                                                                                             |
| Diabetes mellitus                                                 | Documented diagnosis of Type I or Type II diabetes mellitus                                                                                                                                                                                                                                                                                 |
| Heart failure                                                     | Documented diagnosis of congestive heart failure prior to this admission                                                                                                                                                                                                                                                                    |
| Acute Myocardial infarction                                       | Documented diagnosis of myocardial ischemia (acute coronary syndrome) or myocardial infarction during this admission                                                                                                                                                                                                                        |
| Acute stroke                                                      | Documented diagnosis of an intracranial or intraventricular hemorrhage or thrombosis during this admission                                                                                                                                                                                                                                  |
| Hypotension/Hypoperfusion                                         | Evidence of hypotension within 4 hours up to the time of the event, defined by ANY of the following <ol style="list-style-type: none"> <li>1. SBP &lt; 90 or MAP &lt; 60 mmHg</li> <li>2. Vasopressor or inotropic requirement after volume expansion (except for dopamine ≤ 3 mcg/kg/min)</li> <li>3. Intra-aortic balloon pump</li> </ol> |
| Hepatic insufficiency                                             | Evidence of hepatic insufficiency within 24 hours up to the time of the event, defined by ANY of the following <ol style="list-style-type: none"> <li>1. Total bilirubin &gt; 2 mg/dL and AST &gt; 2x normal</li> <li>2. Cirrhosis</li> </ol>                                                                                               |

|                                                                         |                                                                                                                                                                                                                                                                                               |
|-------------------------------------------------------------------------|-----------------------------------------------------------------------------------------------------------------------------------------------------------------------------------------------------------------------------------------------------------------------------------------------|
| Renal insufficiency                                                     | Evidence of renal insufficiency prior to the event, defined by ANY of the following<br><br>1. Requiring ongoing dialysis or extracorporeal filtration therapies<br>2. Creatinine > 2 mg/dL within 24 hours up to the time of the event                                                        |
| Metabolic or electrolyte abnormality                                    | Evidence of metabolic/electrolyte abnormality within 4 hours up to the time of the event, defined by ANY of the following<br><br>1. Sodium < 125 or > 150 mEq/L<br>2. Potassium < 2.5 or > 6 mEq/L<br>3. Arterial pH < 7.3 or > 7.5<br>4. Lactate > 2.5 mmol/L<br>5. Blood glucose < 60 mg/dL |
| Septicemia                                                              | Bloodstream infection where antibiotics have not yet been started or the infection is still being treated with antibiotics                                                                                                                                                                    |
| Major Trauma                                                            | Evidence of multi-system injury or single system injury associated with shock or altered mental status (during this hospitalization)                                                                                                                                                          |
| Metastatic or hematologic malignancy                                    | Any solid tissue malignancy with evidence of metastasis, or any blood borne malignancy                                                                                                                                                                                                        |
| <b>Therapeutic interventions in place at the time of cardiac arrest</b> |                                                                                                                                                                                                                                                                                               |
| Mechanical ventilation                                                  | Including use of ventilation via invasive airway or non-invasive ventilation (CPAP or BiPAP)                                                                                                                                                                                                  |
| Intravenous vasopressors                                                | Use of dobutamine, dopamine > 3 mcg/kg/min, epinephrine, norepinephrine, phenylephrine, other vasoactive agent ongoing at the time of the event                                                                                                                                               |
| Dialysis                                                                | Use of hemodialysis, peritoneal dialysis, continuous arteriovenous or veno-venous hemofiltration/dialysis ongoing at time of the event                                                                                                                                                        |
| <b>Hospital characteristics</b>                                         | (Source: American Hospital Association Data Year 2009)                                                                                                                                                                                                                                        |
| Geographic location                                                     | Categorized as North Mid-Atlantic, South Atlantic (including Puerto Rico, North Central, South Central Mountain/Pacific based on the United States Census 2010                                                                                                                                |
| Hospital ownership                                                      | Categorized as for-profit, government, and not-profit                                                                                                                                                                                                                                         |
| Hospital bed size                                                       | Categorized as less than 250, 250-499, and 500 or more                                                                                                                                                                                                                                        |
| Number of cardiac ICU beds                                              | Defined as cardiac ICU beds as percent of total beds, less than 2.5, 2.5-10, and 10 or more.                                                                                                                                                                                                  |
| Teaching status                                                         | Categorized as major teaching (hospitals with a residency and a fellowship program), minor teaching (hospitals with a residency program but no fellowship program), and non-teaching (hospitals without a residency or fellowship program)                                                    |

**Abbreviations:** AST, aspartate aminotransferase; BiPAP, bi-level positive airway pressure; CPAP, continuous positive airway pressure; ICU, intensive care unit; MAP, mean arterial pressure; PEA, pulseless electrical activity; SBP: systolic blood pressure



**eTable 2:** Hospital- and patient-level predictors of delayed epinephrine use in hierarchical model with hospital-level random effects and patient level fixed effects.

| Characteristics                                | Odds ratio | Lower confidence limit | Upper confidence limit | P-Value |
|------------------------------------------------|------------|------------------------|------------------------|---------|
| <b>Hospital-level covariates</b>               |            |                        |                        |         |
| Total hospital beds (compared to > 500 beds)   |            |                        |                        | 0.92    |
| <250                                           | 0.97       | 0.80                   | 1.19                   |         |
| 250-499                                        | 1.00       | 0.85                   | 1.18                   |         |
| Overall admissions (vs. >30,000)               |            |                        |                        | 0.0104  |
| <10,000/year                                   | 1.10       | 0.87                   | 1.39                   |         |
| 10,000 – 30,000                                | 0.88       | 0.74                   | 1.05                   |         |
| Below median case volume (100 cases) vs. above | 1.30       | 1.17                   | 1.44                   | <.0001  |
| Non-teaching vs. teaching hospital             | 1.01       | 0.91                   | 1.13                   | 0.84    |
| CVICU to total beds (compared to >10%)         |            |                        |                        | 0.08    |
| <2.5%                                          | 0.88       | 0.66                   | 1.17                   |         |
| 2.5-10%                                        | 0.98       | 0.73                   | 1.31                   |         |
| <b>Patient-level covariates</b>                |            |                        |                        |         |
| Age categories (vs. >80 years)                 |            |                        |                        | 0.021   |
| <50 years                                      | 1.05       | 0.98                   | 1.12                   |         |
| 50-59 years                                    | 1.03       | 0.96                   | 1.10                   |         |
| 60-69 years                                    | 0.94       | 0.88                   | 1.00                   |         |
| 70-79 years                                    | 0.99       | 0.93                   | 1.05                   |         |
| Sex                                            | 1.00       | 0.96                   | 1.04                   | 0.80    |
| Initial rhythm, PEA vs. Asystole               | 1.12       | 1.08                   | 1.17                   | <.0001  |
| Delayed chest compression (>1 min)             | 2.66       | 2.52                   | 2.81                   | <.0001  |
| Monitored vs. non-monitored ward               | 0.50       | 0.48                   | 0.53                   | <.0001  |
| Acute stroke                                   | 1.05       | 0.95                   | 1.16                   | 0.31    |
| Heart failure                                  | 1.07       | 1.02                   | 1.13                   | 0.0068  |
| Diabetes                                       | 1.02       | 0.97                   | 1.06                   | 0.47    |
| Hepatic insufficiency                          | 0.93       | 0.86                   | 1.01                   | 0.07    |
| Hypotension                                    | 0.91       | 0.86                   | 0.96                   | 0.0003  |
| Major trauma                                   | 0.91       | 0.80                   | 1.03                   | 0.12    |
| Metastatic malignancy                          | 0.96       | 0.90                   | 1.02                   | 0.14    |
| Fluid electrolyte disorder                     | 0.97       | 0.92                   | 1.03                   | 0.33    |
| Acute myocardial infarction                    | 0.95       | 0.89                   | 1.01                   | 0.13    |
| Renal insufficiency                            | 1.02       | 0.98                   | 1.07                   | 0.37    |
| Septicemia                                     | 0.83       | 0.79                   | 0.88                   | <.0001  |
| Mechanical ventilation                         | 0.47       | 0.45                   | 0.50                   | <.0001  |
| Hemodialysis                                   | 1.00       | 0.88                   | 1.13                   | 0.95    |
| Vasopressor use                                | 0.69       | 0.65                   | 0.74                   | <.0001  |

**eTable 3:** Sensitivity analysis for outcomes after redefining delayed epinephrine as 1<sup>st</sup> dose of epinephrine >3 minutes. Reported as medians and corresponding interquartile ranges (in parenthesis)

| Hospital risk-standardized survival | Quartiles of delay    |                       |                       |                      | P-value (trend) |
|-------------------------------------|-----------------------|-----------------------|-----------------------|----------------------|-----------------|
|                                     | Q1                    | Q2                    | Q3                    | Q4                   |                 |
| To discharge                        | 13.5% (11.2% - 16.4%) | 12.4% (10.7% - 14.6%) | 11.9% (10.0% - 14.9%) | 11.2% (9.8% - 12.7%) | <0.0001         |
| With CPC 1 or 2                     | 8.4% (5.0% - 12.1%)   | 8.2% (5.6% - 11.0%)   | 7.0% (5.0% - 10.9%)   | 6.7% (4.9% - 8.6%)   | <0.0001         |

Q1-Q4: Hospital quartiles for proportion of patients with delayed epinephrine use, Q1 (least delay) through Q4 (most delay)

Abbreviations: CPC – cerebral performance score

### **Get With The Guidelines-Resuscitation Investigators**

Besides the authors Saket Girotra, MD SM, Paul S. Chan, MD MSc and Michael W. Donnino MD, members of the Get With The Guidelines-Resuscitation Adult Task Force include:

Steven M. Bradley MD, MPH, VA Eastern Colorado Healthcare System  
Monique L. Anderson, MD Duke University School of Medicine  
Matthew M. Churpek, MD MPH PhD, University of Chicago  
Dana P. Edelson, MD, MS, University of Chicago  
Robert T. Faillace, MD, ScM, Geisinger Healthcare System  
Romergryko Geocadin, MD, Johns Hopkins University School of Medicine  
Ahamed H. Idris, MD, FACEP FAHA, University of Texas Southwestern  
Raina Merchant, MD, MSHP, University of Pennsylvania School of Medicine  
Vincent N. Mosesso, Jr., MD, University of Pittsburgh School of Medicine  
Joseph P. Ornato, MD, Virginia Commonwealth University  
Mary Ann Peberdy, MD FACC FAHA, Virginia Commonwealth University  
Sarah M. Perman, MD MSCE, University of Colorado  
Mindy Smyth, MSN RN CCRN CAN
